# Supplementary material for: Identifying the Evolutionary Building Blocks of the Cardiac Conduction System
Source: PubMed Central journal article supplement (PMC3439475; doi:10.1371/journal.pone.0044231), 2012-09-11
Supplement: pone.0044231.s003.pdf [file pone.0044231.s003.pdf]

3D

3D

3D

3D

3D

3D

3D

3D
